# Supplementary material
Source: Springer Nature journal article supplement (https://www.springermedizin.de/resource/supplementary/12947_2012_447_MOESM2_ESM.pdf/9555782)

**End diastole**

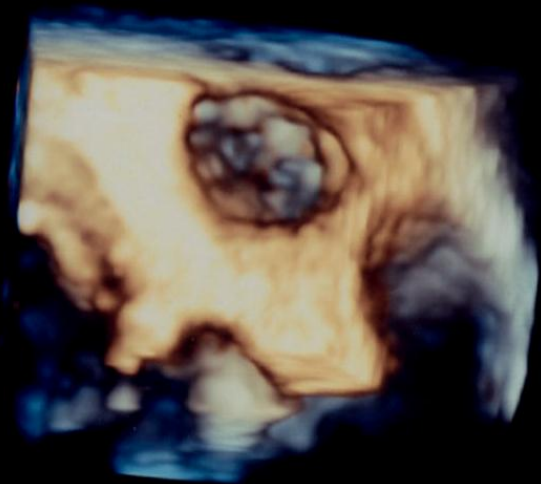

**Mid systole**

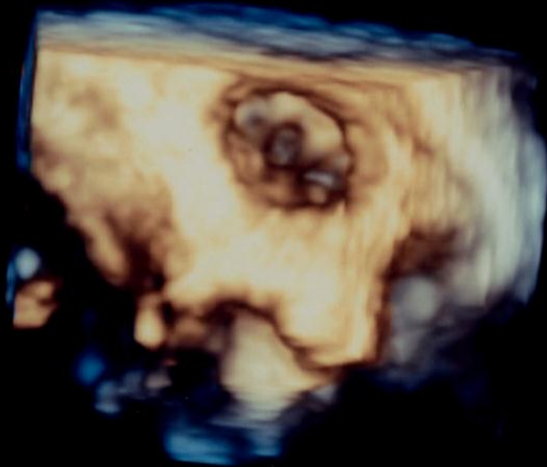

**End systole**

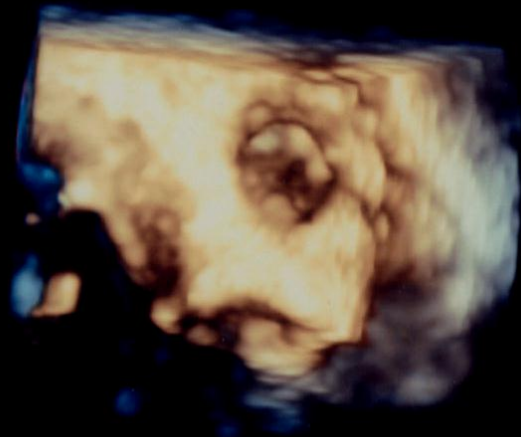

Supplement: MOESM2 [file 9555782]
